# Supplementary material for: Vertically aligned Fe2TiO5 nanorods and coupling of NiMoO4/CoMoO4 as a hole-transfer cocatalyst for enhancing photoelectrochemical water oxidation performance
Source: Royal Society of Chemistry journal article supplement (doi:10.1039/d2cy01253g), 2022-01-01
Supplement: d2cy01253g1.pdf [file d2cy01253g1.pdf]

## Supporting Information

### **Vertically Aligned Nanorods Fe<sub>2</sub>TiO<sub>5</sub> and Coupling of NiMoO<sub>4</sub>/CoMoO<sub>4</sub> as A Hole-Transfer Cocatalyst for Enhancing Photoelectrochemical Water Oxidation Performance**

Baohua Ding<sup>a</sup>, Haiyan Li<sup>a</sup>, Ruonan Wang<sup>a</sup>, Bohua Dong<sup>a,\*</sup>, Lixin Cao<sup>a,\*</sup>

<sup>a</sup> School of Materials Science and Engineering, Ocean University of China, 238 Songling Road, Qingdao,  
266100, PR China

\* Corresponding authors

\* E-mail: caolixin@ouc.edu.cn (L. Cao), dongbohua@ouc.edu.cn (B. Dong).

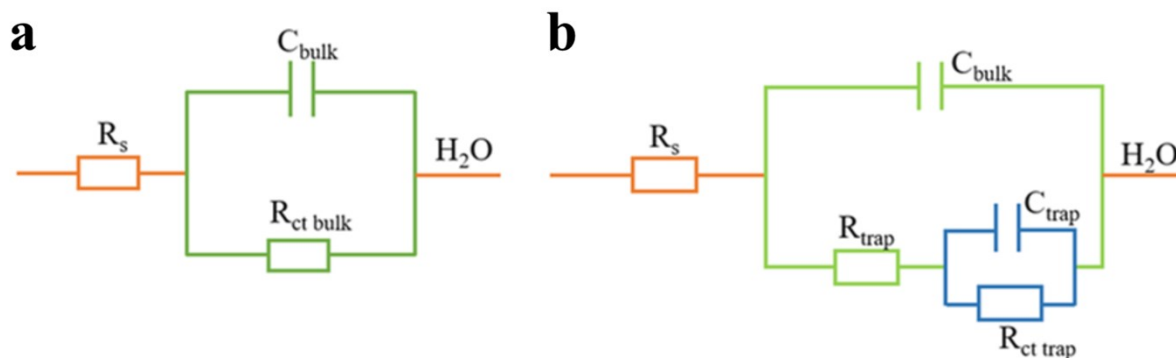

**Figure S1.** (a) Equivalent circuit (EC) for the charge transfer process of  $\text{Fe}_2\text{TiO}_5$  composite photoanode under dark,  $R_s$ , resistance associated with the electric contact of the electrode, electrolyte, etc.  $C_{\text{bulk}}$ , Bulk capacitance of  $\text{Fe}_2\text{TiO}_5$  related to charge accumulation.  $R_{\text{ct bulk}}$ , Resistance of hole transfer from  $\text{Fe}_2\text{TiO}_5$  composite photoanode to water molecule. there is no surface states mediated process under dark. (b) Equivalent circuit (EC) for the charge transfer process of  $\text{Fe}_2\text{TiO}_5$  composite photoanode under illumination, the  $\text{Fe}_2\text{TiO}_5$  SEI is mediated by surface states.  $R_s$ , resistance associated with the electric contacts of the electrode, electrolyte, etc.  $C_{\text{bulk}}$ , Bulk capacitance of  $\text{Fe}_2\text{TiO}_5$  related to charge accumulation.  $R_{\text{trap}}$ , Surface state hole trapping resistance.  $R_{\text{ct trap}}$ , Resistance of hole transfer from surface state to water molecule.  $C_{\text{trap}}$ , Surface state charge accumulation capacitance.

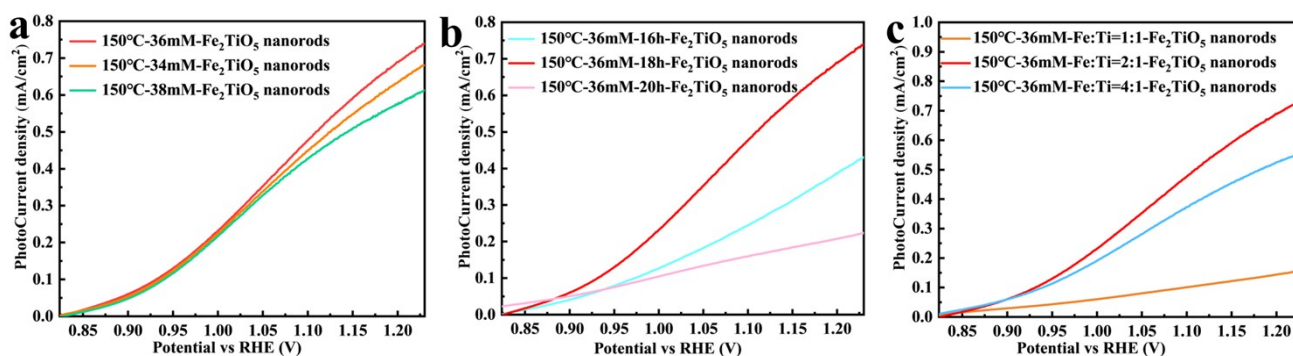

**Figure S2.** (a) precursor solution concentration, (b) hydrothermal time and (c) ratio of iron to titanium atoms in precursor solution optimization process shown in J-V curves. The optimization results were 36 mM, 18 h, 2:1, respectively.

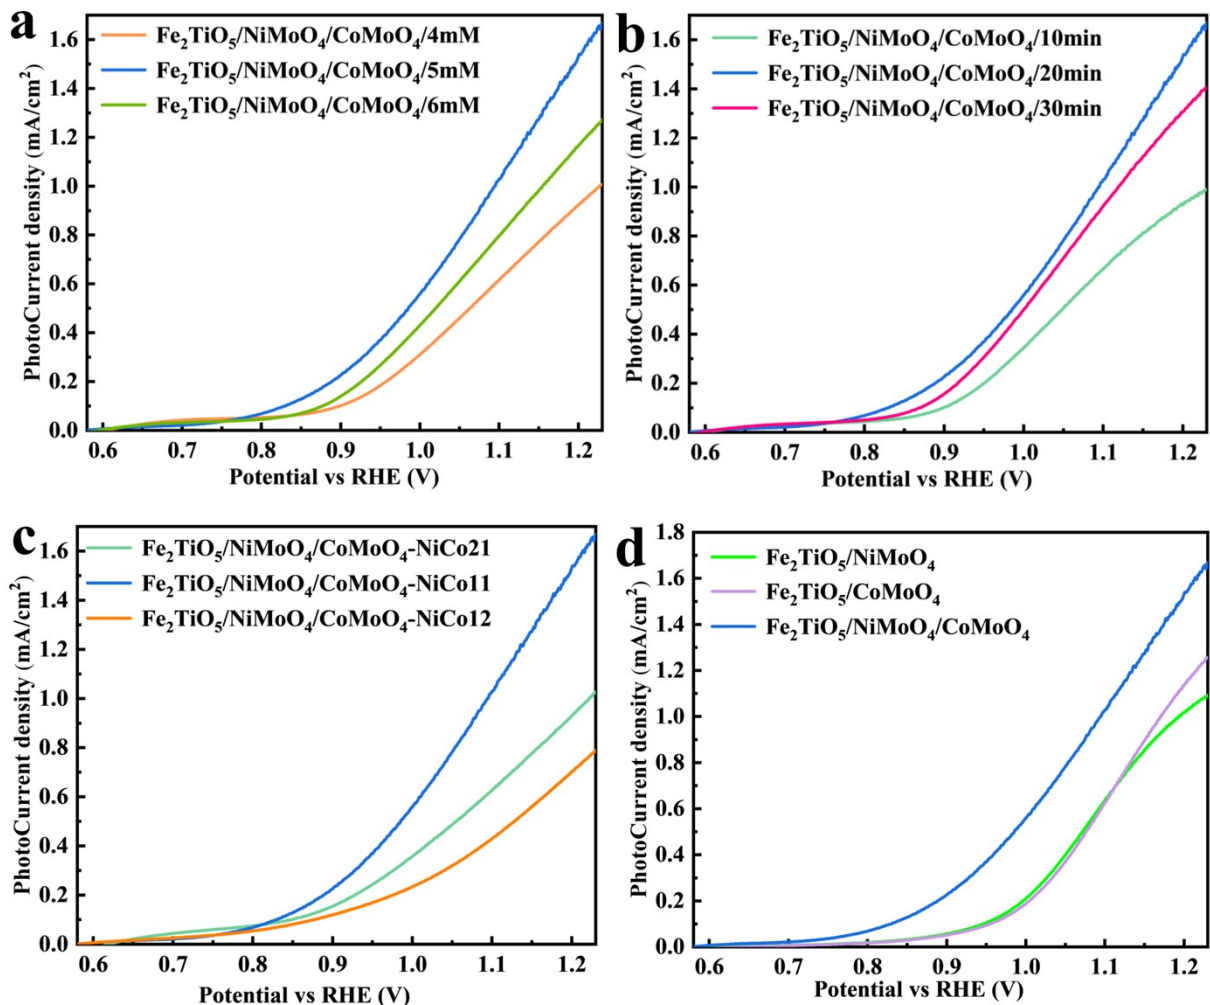

**Figure S3.** (a) precursor solution concentration, (b) hydrothermal time, (c) ratio of cobalt to nickel atoms in precursor solution and (d) species of cobalt and nickel atoms in precursor solutions optimization process shown in J-V curves. The optimization results were 5mM, 20min, CoNi-11, NiMoO<sub>4</sub>/CoMoO<sub>4</sub>.

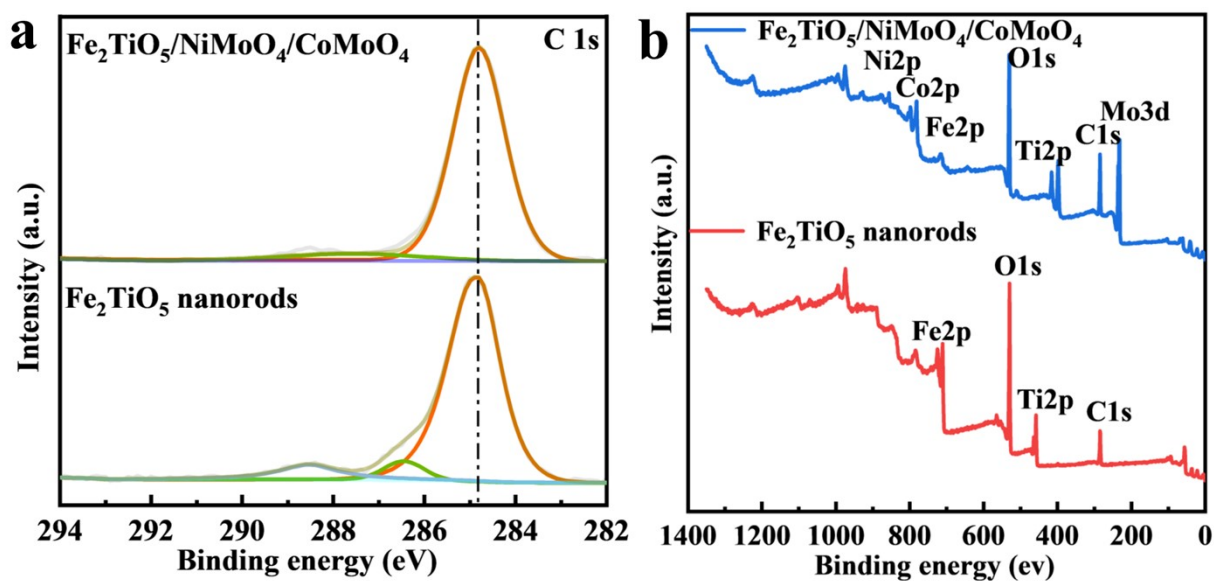

**Figure S4.** XPS spectrum of (a) C1s, (b) XPS survey spectrum of  $\text{Fe}_2\text{TiO}_5/\text{NiMoO}_4/\text{CoMoO}_4$ .

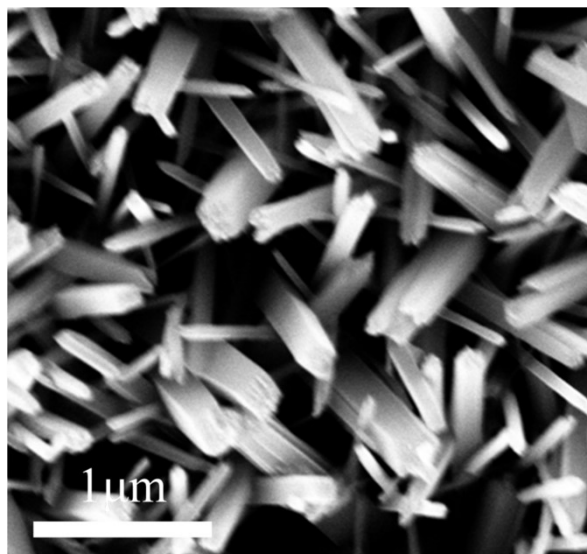

**Figure S5.** SEM image of  $\text{TiO}_2$  nanorods.

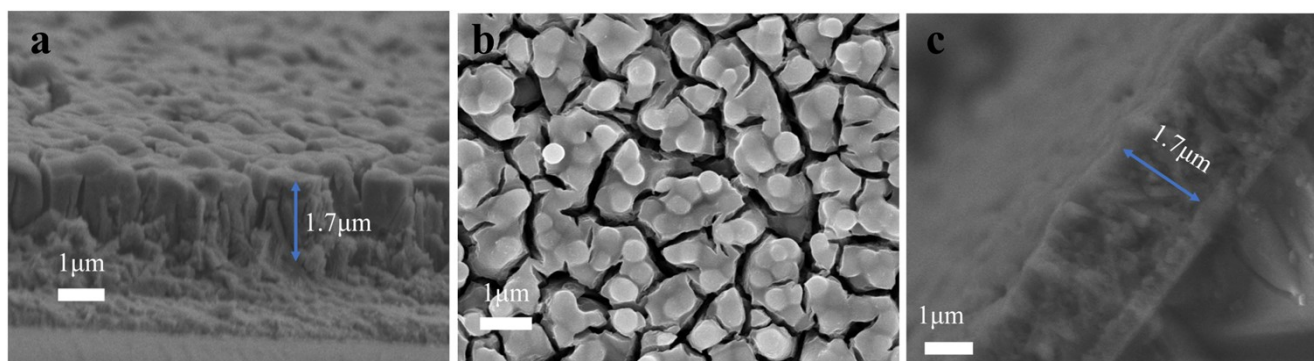

**Figure S6.** SEM images of (a) cross-sectional of  $\text{Fe}_2\text{TiO}_5$  nanorods, (b)  $\text{Fe}_2\text{TiO}_5/\text{NiMoO}_4/\text{CoMoO}_4$  and (c) cross-sectional of  $\text{Fe}_2\text{TiO}_5/\text{NiMoO}_4/\text{CoMoO}_4$ .

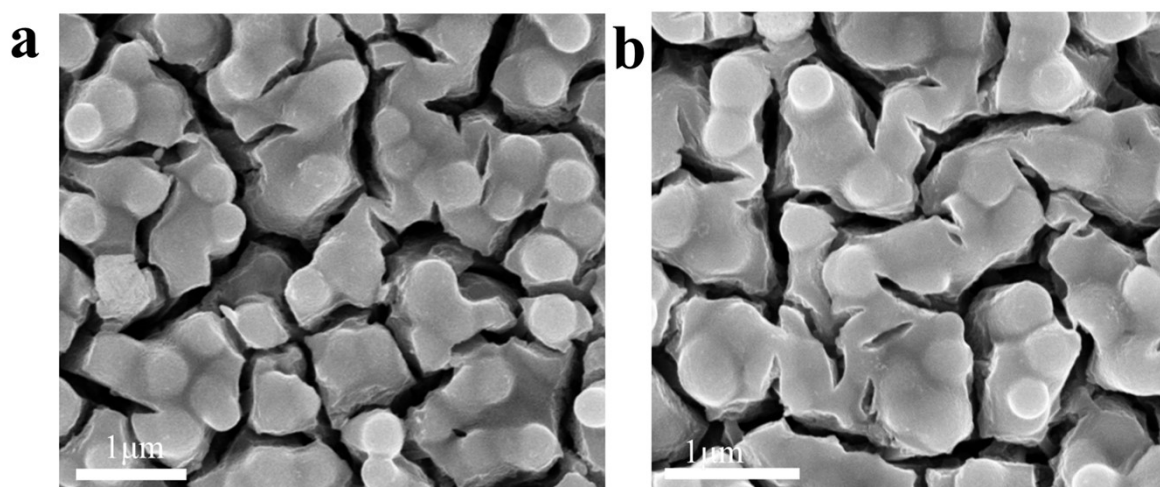

**Figure S7.** SEM images of  $\text{Fe}_2\text{TiO}_5/\text{NiMoO}_4/\text{CoMoO}_4$  (a) before and (b) after 2 hours of stability

measurement.

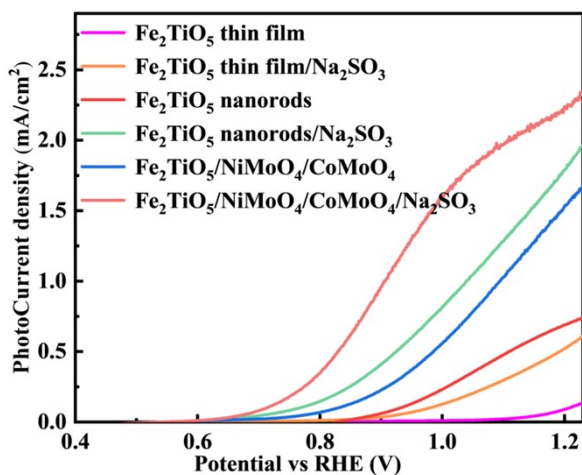

**Figure S8.** J–V curves of Fe<sub>2</sub>TiO<sub>5</sub> thin film, Fe<sub>2</sub>TiO<sub>5</sub> nanorods and Fe<sub>2</sub>TiO<sub>5</sub>/NiMoO<sub>4</sub>/CoMoO<sub>4</sub> in 1.0 M KOH with and without 0.5M Na<sub>2</sub>SO<sub>3</sub> under AM 1.5 G irradiation.

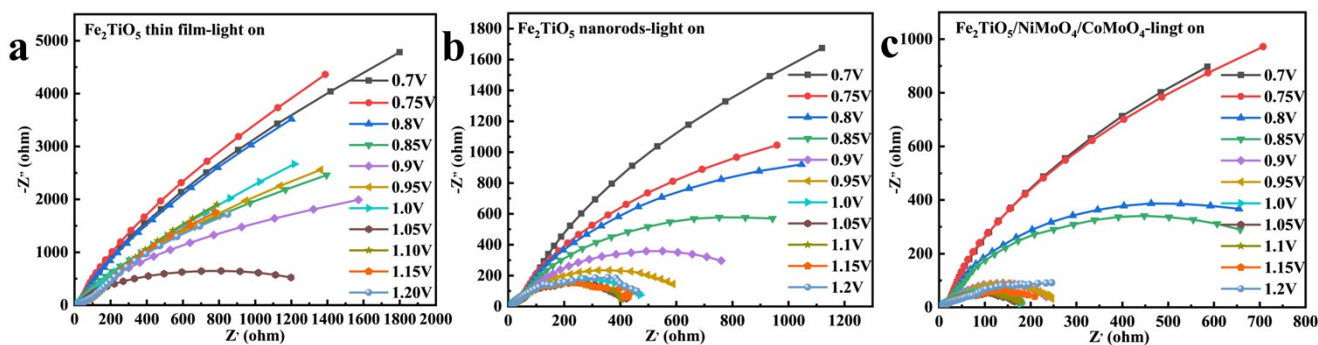

**Figure S9.** Nyquist plots under light illumination of (a) Fe<sub>2</sub>TiO<sub>5</sub> thin film, (b) Fe<sub>2</sub>TiO<sub>5</sub> nanorods and (c) Fe<sub>2</sub>TiO<sub>5</sub>/NiMoO<sub>4</sub>/CoMoO<sub>4</sub> at 0.7, 0.75, 0.8, 0.85, 0.9, 0.95, 1.0, 1.05, 1.1, 1.15, 1.2 V<sub>RHE</sub>.

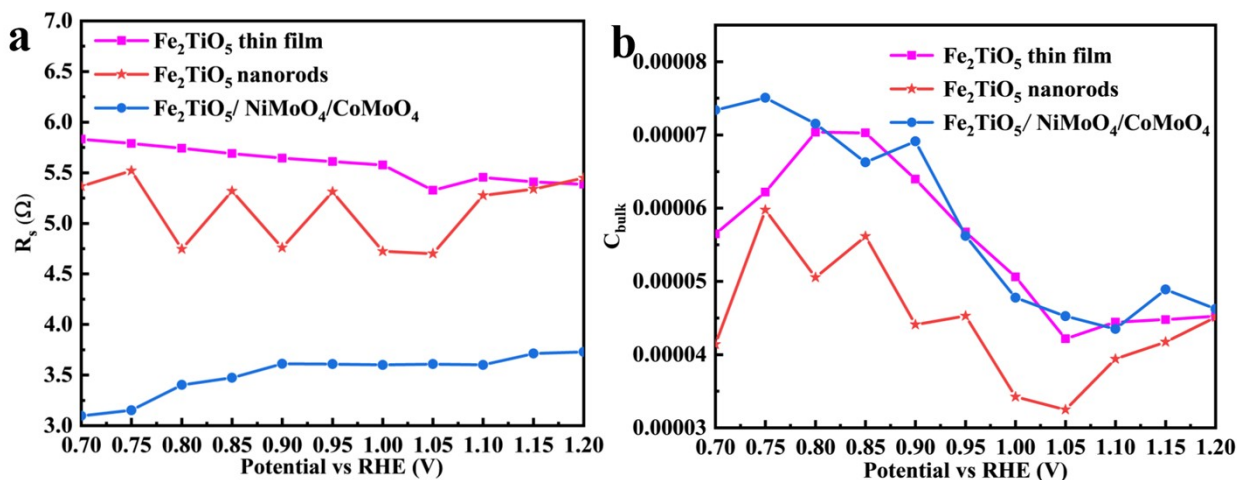

**Figure S10.** (a)  $R_s$ , (b)  $C_{\text{bulk}}$  fitting values from the impedance response of the  $\text{Fe}_2\text{TiO}_5$  thin film,  $\text{Fe}_2\text{TiO}_5$  nanorods and  $\text{Fe}_2\text{TiO}_5/\text{NiMoO}_4/\text{CoMoO}_4$  under AM 1.5 G illumination.

As Figure S9. (a) shown the values of  $R_s$  follow this order:  $\text{Fe}_2\text{TiO}_5$  thin film >  $\text{Fe}_2\text{TiO}_5$  nanorods >  $\text{Fe}_2\text{TiO}_5/\text{NiMoO}_4/\text{CoMoO}_4$ . The results reflected that nanorods allowed directional electron transport to the back substrates more easily than flat films, reducing contact resistance. After loading the  $\text{NiMoO}_4/\text{CoMoO}_4$ , not only the backside contact resistance, but also the contact resistance between the composite photoanode and electrolyte was greatly reduced, and  $R_s$  was greatly reduced. Figure S9. (b) showed that  $\text{Fe}_2\text{TiO}_5/\text{NiMoO}_4/\text{CoMoO}_4$  and  $\text{Fe}_2\text{TiO}_5$  thin film had similar  $C_{\text{bulk}}$  values, but  $\text{Fe}_2\text{TiO}_5$  thin film had the lowest photoelectric response. This may be the fact that all the holes of  $\text{Fe}_2\text{TiO}_5$  thin film were concentrated in the bulk of  $\text{Fe}_2\text{TiO}_5$  thin film, resulting in serious bulk recombination. This viewpoint had also been verified when discussing the  $R_{\text{trap}}$ ,  $R_{\text{ct trap}}$ ,  $C_{\text{trap}}$  and DOS.
